# Supplementary material for: Neonatal onset inflammatory bowel disease and immunodeficiency due to compound heterozygous variants in RIPK1: Expanding the phenotypic spectrum and literature review
Source: Research Square preprint supplement (doi:10.21203/rs.3.rs-6212184/v1), 2025-04-01
Supplement: Supplementary file 1 [file 23e67062b0a2aa4c2fcd0f3b.docx]

Supplementary Table 1. Immunological data of the patient

|  | Result | Reference value |
| --- | --- | --- |
| T cells | 47.03%↓↓↓ | 64-73% |
| CD4+ T cells | 28.01%↓ | 29-36% |
| Central memory CD4+ T cells | 8.35%↓↓ | 13.88-48.12% |
| Effector memory CD4+ T cells | 0.32%↓↓ | 0.94-6.46% |
| Naive CD4+ T cells | 91.18%↑↑↑ | 46.14-84.40% |
| CD8+ T cells | 16.91%↓↓ | 24-34% |
| TCRαβ+double-negative T cells | 1.93%↑ | 0.37-1.80% |
| TCRγδ+double-negative T cells | 4.67%↓ | 4.94-17.98% |
| B cells | 45.41% ↑↑↑ | 14-21% |
| Naive B cells | 91.53%↑↑↑ | 65.54-86.62% |
| Memory B Cells | 2.72%↓ | 2.98-14.18% |
| Transitional B cells | 4.87%↓ | 5.24-17.22% |
| NK cells | 6.54%↓↓ | 11-23% |
